# Supplementary material for: Nearly three-dimensional Dirac fermions in an organic crystalline material unveiled by electron spin resonance
Source: Royal Society of Chemistry journal article supplement (doi:10.1039/d3ma00619k), 2023-11-01
Supplement: d3ma00619k1.pdf [file d3ma00619k1.pdf]

# Nearly three-dimensional Dirac fermions in an organic crystalline material unveiled by electron spin resonance

Ryuhei Oka, Keishi Ohara, Naoya Tajima, Toshihiro Shimada, and Toshio Naito

## Electronic Supplementary Information

### Experimental Details

The neutral ET was purchased from Tokyo Chemical Industry Co., Ltd. (TCI). The single crystals of  $\alpha$ -ET<sub>2</sub>I<sub>3</sub> were synthesised as reported.<sup>S1</sup> The electron spin resonance spectra of the X-band (~9.3 GHz) were measured on the single crystals of  $\alpha$ -D<sub>2</sub>I<sub>3</sub> in the temperature range 120-300 K using a JEOL JES-FA100. The single crystal was mounted on a Teflon piece settled with a minimal amount of Apiezon N grease, sealed in a 5 mm diameter quartz sample tube in a low-pressure (~ 20 mmHg) helium atmosphere. The  $Q$ -values, time constant, sweep time, modulation, and its amplitude were 4700-8200, 0.03 s, 1 min, 100 kHz, and 2 mT, respectively. The root dependence of the ESR intensities on the microwave power was checked for saturation and the power was selected to be 9 mW. The magnetic field was corrected by a gauss meter (JEOL NMR Field Meter ES-FC5) at the end of every measurement and was double-checked using a Mn(II) compound diluted in MgO powder as an external standard sample. The temperature was controlled using a continuous flow-type liquid N<sub>2</sub> cryostat with a digital temperature controller (JEOL) so as not to allow the temperature variation to exceed  $\pm 0.5$  K during the field sweep. The cooling rate was -10 K/min. Magnetic fields ( $\mathbf{B}$ ) are initially ( $\theta = 0$ ) applied parallel to the  $a$ -axis for all the samples. In the measurements of anisotropy, the angle  $\theta$  defines the rotation angle around the  $b$ -axis from the  $a$ -axis toward the  $c$ -axis. The temperature- and magnetic-field-angular-dependencies were respectively examined using the same single crystal, and different crystals were examined for checking reproducibility and sample dependence. For detecting any artefact such as cracking of the crystals, the ESR spectra at 296 K and  $\theta = 0$  were checked before and after the temperature- and magnetic-field-angular-dependence measurements.

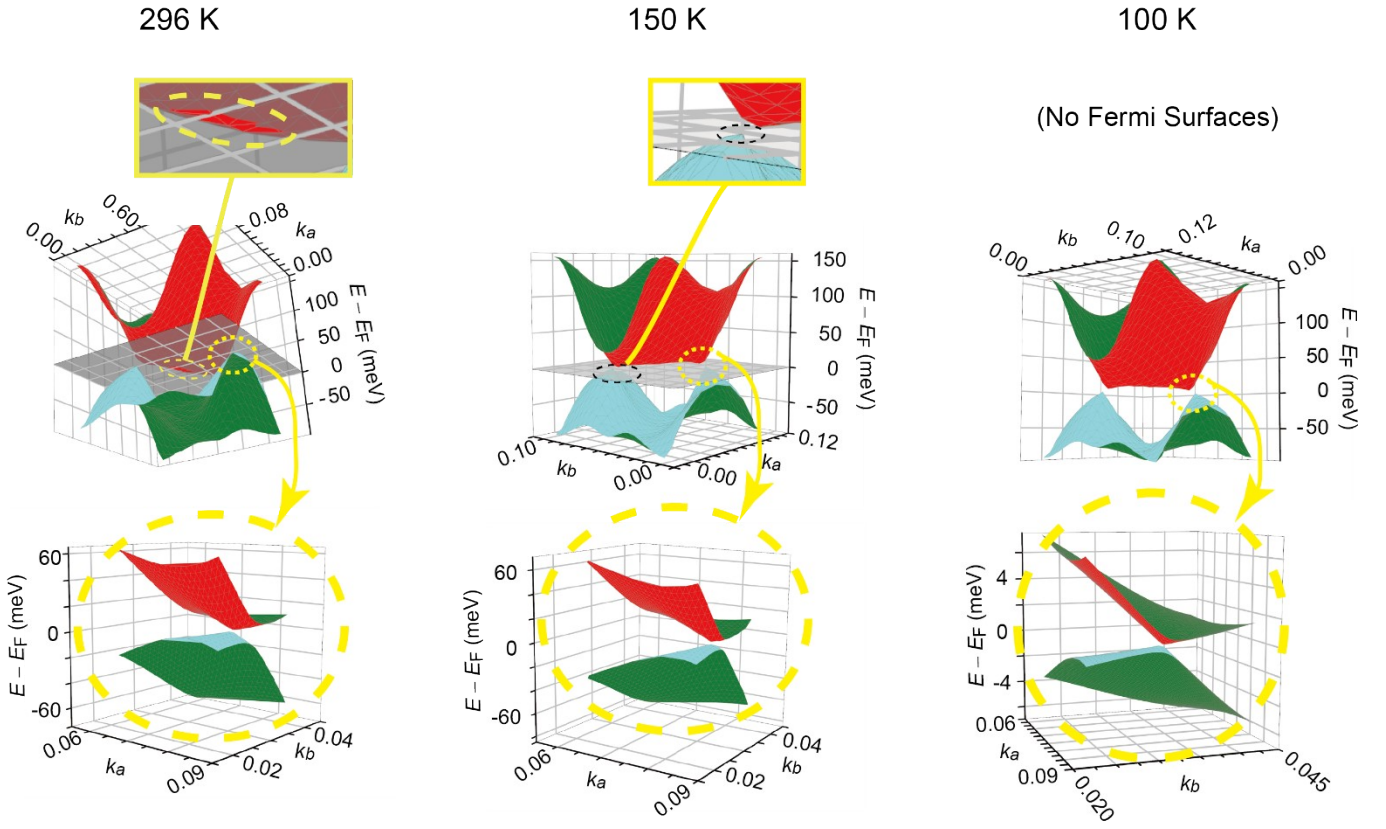

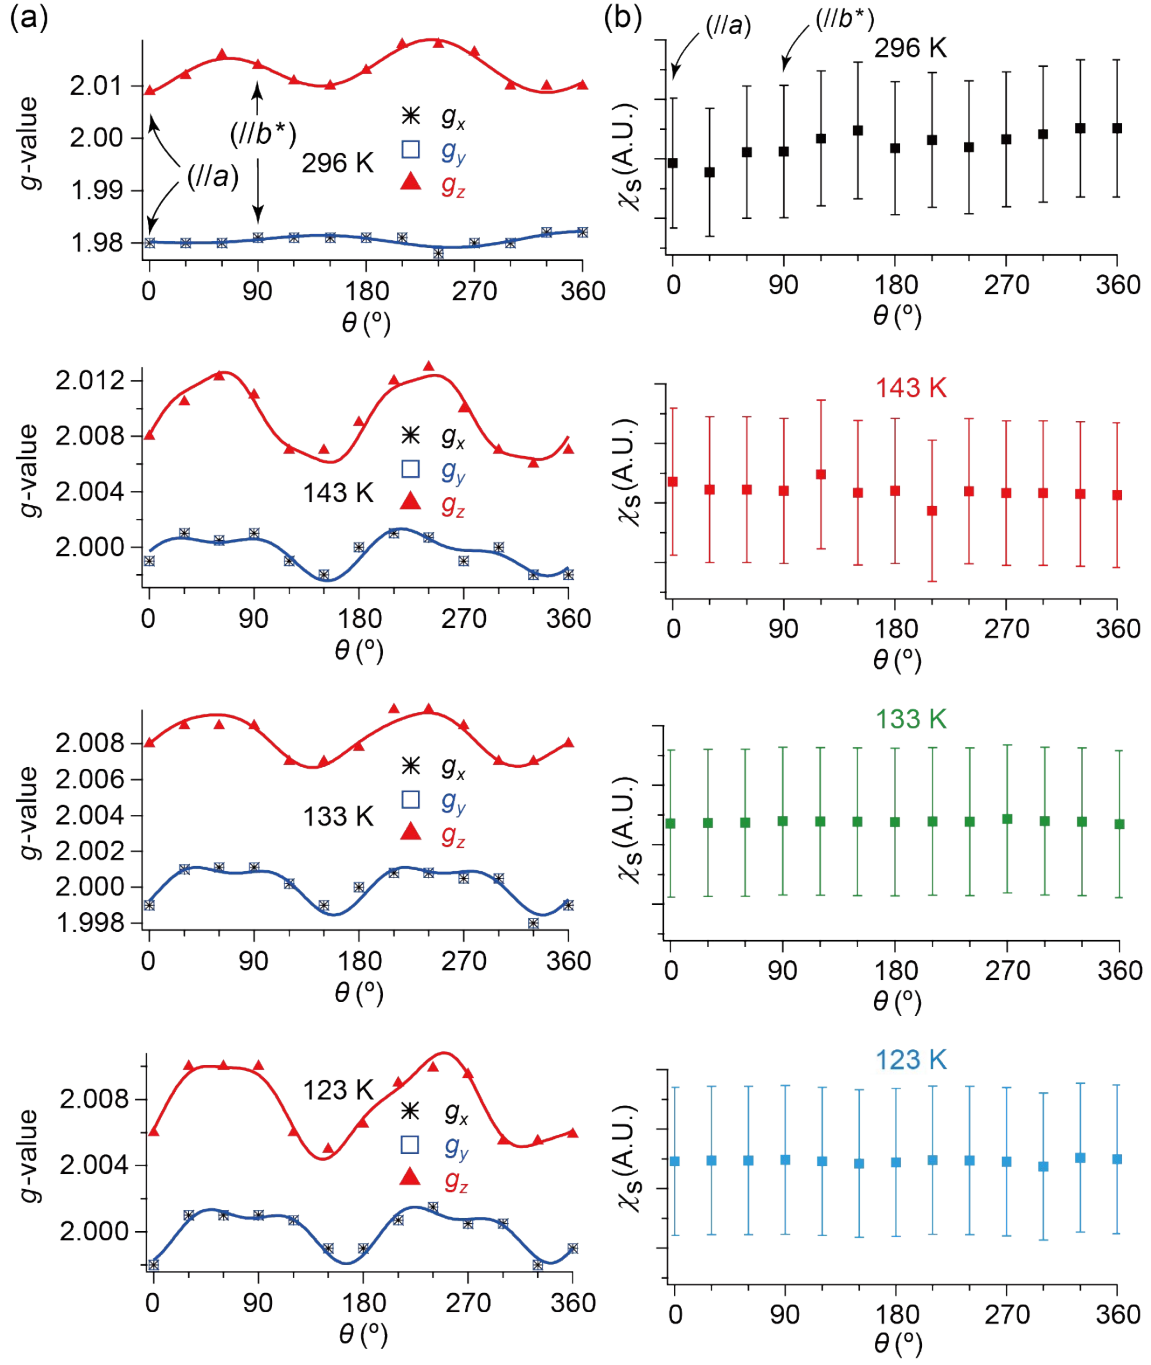

**Fig. S2.**  $\theta$ - and  $T$ -dependencies in the ESR spectra of (a)  $g$ -values and (b) spin susceptibility  $\chi_s$  when the single crystal was rotated around the  $c$ -axes. The susceptibility is shown in an arbitrary unit, as the absolute values were not estimated. The angle  $\theta = 0^\circ$  indicates that the applied magnetic field is parallel with the  $a$ -axis in both rotations. In all the panels, the data are derived from the simulation spectra and are shown with error bars ( $\pm 10\%$ ). In each panel of (a), the curves indicate the best-fitting curves using Eq. 2. The obtained parameters are summarised in **Tables S1—S8**. Note that all  $g_x$  and  $g_y$  coincide with each other in each panel of (a). The subscripts  $x$ ,  $y$  and  $z$  of the  $g$ -values approximately indicate the following directions:  $(x, y) \approx (a, b)$  or  $(b, a)$ , and  $z \approx c$ -axis. Whether  $(x, y) \approx (a, b)$  or  $(b, a)$  could not be determined based on the ESR data. Although the unit of angle  $\theta$  was radian in the fitting, it is described in degree in this figure.

**Table S1.** The parameters for reproducing the main peak at different magnetic-tilted-angles ( $\theta/^\circ$ ) for the *b*-axis rotation spectra at 296 K.\*

| $\theta/^\circ$ | $g_x$ | $g_y$ | $g_z$ | $\Gamma_x$ | $\Gamma_y$ | $\Gamma_z$ |
|-----------------|-------|-------|-------|------------|------------|------------|
| 0               | 1.99  | 2     | 2.022 | 7          | 7          | 10         |
| 30              | 1.982 | 2.005 | 2.03  | 6.5        | 6          | 5.5        |
| 60              | 1.976 | 2.02  | 2.032 | 9.5        | 9          | 5.5        |
| 90              | 1.976 | 2.02  | 2.032 | 6          | 9          | 10.5       |
| 120             | 1.976 | 2.02  | 2.032 | 6          | 9          | 10.5       |
| 150             | 1.99  | 2.005 | 2.022 | 8          | 7          | 10         |
| 180             | 1.99  | 1.998 | 2.022 | 7          | 7          | 10         |
| 210             | 1.982 | 2.005 | 2.03  | 6.5        | 6          | 5.5        |
| 240             | 1.972 | 2.02  | 2.032 | 9.5        | 9          | 5.5        |
| 270             | 1.976 | 2.02  | 2.032 | 6          | 9          | 10.5       |
| 300             | 1.976 | 2.02  | 2.032 | 6          | 9          | 10.5       |
| 330             | 1.99  | 2.005 | 2.022 | 8          | 7          | 10         |
| 360             | 1.99  | 1.998 | 2.022 | 7          | 7          | 10         |

\*Most of the simulated spectrum agreed well with the observed spectrum as shown in **Fig. 6c**.

**Table S2.** The parameters for reproducing the main peak at different magnetic-tilted-angles ( $\theta/^\circ$ ) for the *b*-axis rotation spectra at 143 K.\*

| $\theta/^\circ$ | $g_x$ | $g_y$ | $g_z$ | $\Gamma_x$ (mT) | $\Gamma_y$ (mT) | $\Gamma_z$ (mT) |
|-----------------|-------|-------|-------|-----------------|-----------------|-----------------|
| 0               | 1.98  | 2.015 | 2.027 | 5               | 5               | 4               |
| 30              | 1.972 | 2     | 2.03  | 6.5             | 6               | 3.5             |
| 60              | 1.972 | 2.02  | 2.032 | 9.5             | 9               | 5.5             |
| 90              | 1.972 | 2.02  | 2.09  | 7.5             | 7               | 2.5             |
| 120             | 1.952 | 2.02  | 2.03  | 7.5             | 7               | 2.5             |
| 150             | 1.982 | 2.016 | 2.02  | 7               | 7               | 5               |
| 180             | 1.98  | 2.015 | 2.025 | 5               | 5               | 4               |
| 210             | 1.972 | 2     | 2.02  | 6.5             | 6               | 3.5             |
| 240             | 1.972 | 2.02  | 2.032 | 9.5             | 9               | 5.5             |
| 270             | 1.972 | 2.02  | 2.08  | 7.5             | 7               | 2.5             |
| 300             | 1.952 | 2.02  | 2.03  | 7.5             | 7               | 2.5             |
| 330             | 1.982 | 2.016 | 2.01  | 7               | 7               | 5               |
| 360             | 1.98  | 2.015 | 2.025 | 5               | 5               | 4               |

\*Most of the simulated spectrum agreed well with the observed spectrum as shown in **Fig. 6c**.

**Table S3.** The parameters for reproducing the main peak at different magnetic-tilted-angles ( $\theta/^\circ$ ) for the *b*-axis rotation spectra at 133 K.\*

| $\theta/^\circ$ | $g_x$ | $g_y$ | $g_z$ | $\Gamma_x$ (mT) | $\Gamma_y$ (mT) | $\Gamma_z$ (mT) |
|-----------------|-------|-------|-------|-----------------|-----------------|-----------------|
| 0               | 1.98  | 2.01  | 2.015 | 10              | 10              | 3               |
| 30              | 1.972 | 2     | 2.03  | 7.5             | 7               | 3.5             |
| 60              | 1.972 | 2.02  | 2.032 | 11.5            | 11              | 2               |
| 90              | 1.972 | 2.02  | 2.07  | 11.5            | 11              | 2.5             |
| 120             | 1.972 | 2.02  | 2.04  | 10.5            | 11              | 3               |
| 150             | 1.98  | 2.01  | 2.02  | 9               | 9               | 3               |
| 180             | 1.98  | 2.01  | 2.015 | 10              | 10              | 3               |
| 210             | 1.972 | 2     | 2.02  | 7.5             | 7               | 3.5             |
| 240             | 1.972 | 2.02  | 2.032 | 11.5            | 11              | 2               |
| 270             | 1.972 | 2.02  | 2.07  | 11.5            | 11              | 2.5             |
| 300             | 1.972 | 2.02  | 2.04  | 10.5            | 11              | 3               |
| 330             | 1.98  | 2.01  | 2.02  | 9               | 9               | 3               |
| 360             | 1.98  | 2.01  | 2.015 | 10              | 10              | 3               |

\*Most of the simulated spectrum agreed well with the observed spectrum as shown in **Fig. 6c**.

**Table S4.** The parameters for reproducing the main peak at different magnetic-tilted-angles ( $\theta/^\circ$ ) for the *b*-axis rotation spectra at 123 K.\*

| $\theta/^\circ$ | $g_x$ | $g_y$ | $g_z$ | $\Gamma_x$ (mT) | $\Gamma_y$ (mT) | $\Gamma_z$ (mT) |
|-----------------|-------|-------|-------|-----------------|-----------------|-----------------|
| 0               | 1.99  | 2.002 | 2.003 | 4               | 4               | 1.4             |
| 30              | 1.98  | 2.01  | 2.02  | 9               | 9               | 3               |
| 60              | 1.972 | 2.02  | 2.05  | 11.5            | 11              | 2               |
| 90              | 1.972 | 2.02  | 2.07  | 11.5            | 11              | 2.5             |
| 120             | 1.972 | 2.02  | 2.05  | 11.5            | 11              | 2.5             |
| 150             | 1.98  | 2.01  | 2.02  | 9               | 9               | 3               |
| 180             | 1.99  | 2.002 | 2.003 | 4               | 4               | 1.4             |
| 210             | 1.98  | 2.01  | 2.02  | 9               | 9               | 3               |
| 240             | 1.972 | 2.02  | 2.05  | 11.5            | 11              | 2               |
| 270             | 1.972 | 2.02  | 2.07  | 11.5            | 11              | 2.5             |
| 300             | 1.972 | 2.02  | 2.05  | 11.5            | 11              | 2.5             |
| 330             | 1.98  | 2.01  | 2.02  | 9               | 9               | 3               |
| 360             | 1.99  | 2.002 | 2.003 | 4               | 4               | 1.4             |

\*Most of the simulated spectrum agreed well with the observed spectrum as shown in **Fig. 6c**.

**Table S5.** The parameters for reproducing the main peak at different magnetic-tilted-angles ( $\theta/^\circ$ ) for the  $c$ -axis rotation spectra at 296 K.\*

| $\theta/^\circ$ | $g_x$ | $g_y$ | $g_z$  | $\Gamma_x$ (mT) | $\Gamma_y$ (mT) | $\Gamma_z$ (mT) |
|-----------------|-------|-------|--------|-----------------|-----------------|-----------------|
| 0               | 1.98  | 1.98  | 2.009  | 13              | 13              | 2.18            |
| 30              | 1.98  | 1.98  | 2.012  | 14.19           | 14.45           | 2.18            |
| 60              | 1.98  | 1.98  | 2.016  | 11.69           | 11.55           | 2.78            |
| 90              | 1.981 | 1.981 | 2.014  | 10.5            | 10.5            | 2.82            |
| 120             | 1.981 | 1.981 | 2.011  | 9.5             | 9.5             | 2.82            |
| 150             | 1.981 | 1.981 | 2.01   | 7               | 7               | 2.75            |
| 180             | 1.981 | 1.981 | 2.013  | 10              | 10              | 2.45            |
| 210             | 1.981 | 1.981 | 2.018  | 10              | 10              | 2.45            |
| 240             | 1.978 | 1.978 | 2.018  | 10              | 10              | 2.82            |
| 270             | 1.98  | 1.98  | 2.0165 | 10              | 10              | 2.82            |
| 300             | 1.98  | 1.98  | 2.01   | 9               | 9               | 2.82            |
| 330             | 1.982 | 1.982 | 2.01   | 8.2             | 8.2             | 2.35            |
| 360             | 1.982 | 1.982 | 2.01   | 8.2             | 8.2             | 2.35            |

\*Most of the simulated spectrum agreed well with the observed spectrum as shown in **Fig. 6c**.

**Table S6.** The parameters for reproducing the main peak at different magnetic-tilted-angles ( $\theta/^\circ$ ) for the  $c$ -axis rotation spectra at 143 K.\*

| $\theta/^\circ$ | $g_x$  | $g_y$  | $g_z$  | $\Gamma_x$ (mT) | $\Gamma_y$ (mT) | $\Gamma_z$ (mT) |
|-----------------|--------|--------|--------|-----------------|-----------------|-----------------|
| 0               | 1.999  | 1.999  | 2.008  | 2.39            | 2.39            | 2.24            |
| 30              | 2.001  | 2.001  | 2.0105 | 2.79            | 2.79            | 2.6             |
| 60              | 2.0005 | 2.0005 | 2.0123 | 2.85            | 2.85            | 2.4             |
| 90              | 2.001  | 2.001  | 2.011  | 2.95            | 2.95            | 1.9             |
| 120             | 1.999  | 1.999  | 2.007  | 1.9             | 1.9             | 1.6             |
| 150             | 1.998  | 1.998  | 2.007  | 2.95            | 2.95            | 1.7             |
| 180             | 2      | 2      | 2.009  | 2.95            | 2.95            | 1.75            |
| 210             | 2.001  | 2.001  | 2.012  | 2.95            | 2.95            | 1.75            |
| 240             | 2.0007 | 2.0007 | 2.013  | 3               | 3               | 1.75            |
| 270             | 1.999  | 1.999  | 2.01   | 3               | 3               | 1.98            |
| 300             | 2      | 2      | 2.007  | 3               | 3               | 2.2             |
| 330             | 1.998  | 1.998  | 2.006  | 3               | 3               | 2.2             |
| 360             | 1.998  | 1.998  | 2.007  | 3               | 3               | 2.2             |

\*Most of the simulated spectrum agreed well with the observed spectrum as shown in **Fig. 6c**.

**Table S7.** The parameters for reproducing the main peak at different magnetic-tilted-angles ( $\theta/^\circ$ ) for the *c*-axis rotation spectra at 133 K.\*

| $\theta/^\circ$ | $g_x$  | $g_y$  | $g_z$  | $\Gamma_x$ (mT) | $\Gamma_y$ (mT) | $\Gamma_z$ (mT) |
|-----------------|--------|--------|--------|-----------------|-----------------|-----------------|
| 0               | 1.999  | 1.999  | 2.008  | 2.39            | 2.39            | 1.5             |
| 30              | 2.001  | 2.001  | 2.009  | 2.39            | 2.39            | 2.29            |
| 60              | 2.0011 | 2.0011 | 2.009  | 2.32            | 2.32            | 2.43            |
| 90              | 2.0011 | 2.0011 | 2.009  | 2.32            | 2.32            | 2.05            |
| 120             | 2.0002 | 2.0002 | 2.007  | 2.32            | 2.32            | 1.7             |
| 150             | 1.999  | 1.999  | 2.007  | 2.32            | 2.32            | 2               |
| 180             | 2      | 2      | 2.0078 | 2.32            | 2.32            | 1.95            |
| 210             | 2.0008 | 2.0008 | 2.0099 | 2.32            | 2.32            | 2.06            |
| 240             | 2.0008 | 2.0008 | 2.0099 | 2.32            | 2.32            | 2.06            |
| 270             | 2.0005 | 2.0005 | 2.009  | 2.32            | 2.32            | 2.01            |
| 300             | 2.0005 | 2.0005 | 2.007  | 2.32            | 2.32            | 2.25            |
| 330             | 1.999  | 1.999  | 2.007  | 2.32            | 2.32            | 2.32            |
| 360             | 1.999  | 1.999  | 2.008  | 2.32            | 2.32            | 2.42            |

\*Most of the simulated spectrum agreed well with the observed spectrum as shown in **Fig. 6c**.

**Table S8.** The parameters for reproducing the main peak at different magnetic-tilted-angles ( $\theta/^\circ$ ) for the *c*-axis rotation spectra at 123 K.\*

| $\theta/^\circ$ | $g_x$  | $g_y$  | $g_z$  | $\Gamma_x$ (mT) | $\Gamma_y$ (mT) | $\Gamma_z$ (mT) |
|-----------------|--------|--------|--------|-----------------|-----------------|-----------------|
| 0               | 1.998  | 1.998  | 2.006  | 2.03            | 2.03            | 2               |
| 30              | 2.001  | 2.001  | 2.01   | 2.03            | 2.03            | 2               |
| 60              | 2.0015 | 2.0015 | 2.01   | 2.03            | 2.03            | 2               |
| 90              | 2.001  | 2.001  | 2.01   | 2.03            | 2.03            | 1.85            |
| 120             | 2.0007 | 2.0007 | 2.006  | 2.03            | 2.03            | 1.85            |
| 150             | 1.999  | 1.999  | 2.005  | 2.03            | 2.03            | 1.85            |
| 180             | 1.999  | 1.999  | 2.0065 | 2.03            | 2.03            | 1.85            |
| 210             | 2.0007 | 2.0007 | 2.009  | 2.03            | 2.03            | 1.85            |
| 240             | 2.0015 | 2.0015 | 2.0099 | 2.03            | 2.03            | 1.85            |
| 270             | 2.0005 | 2.0005 | 2.0095 | 2.03            | 2.03            | 1.85            |
| 300             | 2.0005 | 2.0005 | 2.0055 | 1.81            | 1.81            | 2.35            |
| 330             | 1.998  | 1.998  | 2.0055 | 1.6             | 1.6             | 1.65            |
| 360             | 1.999  | 1.999  | 2.0059 | 1.65            | 1.65            | 1.85            |

\*Most of the simulated spectrum agreed well with the observed spectrum as shown in **Fig. 6c**.

**Table S9.** Best-fitting parameters in Eq. 2\* for reproducing the observed  $\theta$ -dependencies of  $g_x$ -values at different temperatures for the  $b$ -axis rotation spectra (Fig. 7).

| $T$ (K) | $A$       | $a$      | $\delta_1$ (rad) | $B$       | $b$       | $\delta_2$ (rad) | $C$    |
|---------|-----------|----------|------------------|-----------|-----------|------------------|--------|
| 296     | 0.016346  | 0.017557 | -1.4487          | 0.005278  | -0.035239 | 2.6742           | 1.976  |
| 143     | 0.015078  | 0.015713 | -1.429           | 0.019092  | 0.0349    | -0.97513         | 1.9551 |
| 133     | 0.0092376 | 0.017453 | -1.309           | 0.0053333 | 0.034907  | -1.0472          | 1.9674 |
| 123     | 0.017511  | 0.017416 | -1.5642          | 0.0066815 | 0.034631  | -1.5213          | 1.9656 |

$$*\chi_s(\theta) \text{ or } g_i(\theta) = A\sin^2(a\theta + \delta_1) + B\sin^2(b\theta + \delta_2) + C, (i = x, y, z)$$

**Table S10.** Best-fitting parameters in Eq. 2\* for reproducing the observed  $\theta$ -dependencies of  $g_y$ -values at different temperatures for the  $b$ -axis rotation spectra (Fig. 7).

| $T$ (K) | $A$      | $a$      | $\delta_1$ (rad) | $B$       | $b$       | $\delta_2$ (rad) | $C$    |
|---------|----------|----------|------------------|-----------|-----------|------------------|--------|
| 296     | 0.025667 | 0.017745 | 1.5189           | 0.0028142 | -0.03971  | -0.8746          | 2.0218 |
| 143     | 0.013121 | 0.015713 | 1.5525           | 0.010439  | 0.0349    | -1.085           | 2.0161 |
| 133     | 0.01686  | 0.017926 | 1.2989           | 0.0071688 | 0.0339    | -0.91384         | 2.0186 |
| 123     | 0.018935 | 0.01649  | 1.7441           | 0.0046186 | 0.0055733 | 2.1382           | 2.0239 |

$$*\chi_s(\theta) \text{ or } g_i(\theta) = A\sin^2(a\theta + \delta_1) + B\sin^2(b\theta + \delta_2) + C, (i = x, y, z)$$

**Table S11.** Best-fitting parameters in Eq. 2\* for reproducing the observed  $\theta$ -dependencies of  $g_z$ -values at different temperatures for the  $b$ -axis rotation spectra (Fig. 7).

| $T$ (K) | $A$      | $a$      | $\delta_1$ (rad) | $B$        | $b$        | $\delta_2$ (rad) | $C$    |
|---------|----------|----------|------------------|------------|------------|------------------|--------|
| 296     | 0.011526 | 0.01749  | 1.7691           | 0.0053094  | -0.03501   | -0.5083          | 2.0315 |
| 143     | 0.04764  | 0.017249 | 1.6778           | 0.037737   | -0.036094  | 2.8839           | 2.0789 |
| 133     | 0.046313 | 0.017259 | 1.6126           | 0.01948    | -0.036293  | 2.6389           | 2.0667 |
| 123     | 0.064716 | 0.017464 | 1.5688           | 0.00043878 | -0.0019695 | 3.4994           | 2.0678 |

$$*\chi_s(\theta) \text{ or } g_i(\theta) = A\sin^2(a\theta + \delta_1) + B\sin^2(b\theta + \delta_2) + C, (i = x, y, z)$$

**Table S12.** Best-fitting parameters in Eq. 2\* for reproducing the observed  $\theta$ -dependencies of spin susceptibilities  $\chi_s$  at different temperatures for the  $b$ -axis rotation spectra (Fig. 7).

| $T$ (K) | $A$    | $a$      | $\delta_1$ (rad) | $B$    | $b$       | $\delta_2$ (rad) | $C$    |
|---------|--------|----------|------------------|--------|-----------|------------------|--------|
| 296     | 8.1999 | 0.017001 | -1.7147          | 3.7935 | -0.035296 | 2.2476           | 12.397 |
| 143     | 8.5936 | 0.017526 | -1.7334          | 3.7197 | -0.035112 | 3.6861           | 16.525 |
| 133     | 8.2938 | 0.017557 | -1.7603          | 3.1706 | -0.069647 | -0.6267          | 15.783 |
| 123     | 7.1473 | 0.017242 | -1.4331          | 5.0088 | -0.034026 | 2.8542           | 16.48  |

$$*\chi_s(\theta) \text{ or } g_i(\theta) = A\sin^2(a\theta + \delta_1) + B\sin^2(b\theta + \delta_2) + C, (i = x, y, z)$$



**Table S13.** Best-fitting parameters in Eq. 2\* for reproducing the observed  $\theta$ -dependencies of  $g_x$ -values at different temperatures for the  $c$ -axis rotation spectra (Fig. S2).

| $T$ (K) | $A$       | $a$      | $\delta_1$ (rad) | $B$       | $b$       | $\delta_2$ (rad) | $C$    |
|---------|-----------|----------|------------------|-----------|-----------|------------------|--------|
| 296     | 0.0026563 | 0.015171 | -1.1826          | 0.0028229 | -0.013695 | 1.3252           | 1.9806 |
| 143     | 0.0028108 | 0.017603 | 2.1338           | 0.001487  | -0.032032 | -1.2829          | 2.0003 |
| 133     | 0.0023485 | 0.017509 | 1.9739           | 0.0010502 | -0.035027 | -0.6962          | 2.0008 |
| 123     | 0.0028008 | 0.018198 | 1.7697           | 0.0013858 | -0.03559  | -0.31621         | 2.0009 |

$$*\chi_s(\theta) \text{ or } g_i(\theta) = A\sin^2(a\theta + \delta_1) + B\sin^2(b\theta + \delta_2) + C, (i = x, y, z)$$

**Table S14.** Best-fitting parameters in Eq. 2\* for reproducing the observed  $\theta$ -dependencies of  $g_y$ -values at different temperatures for the  $c$ -axis rotation spectra (Fig. S2).

| $T$ (K) | $A$       | $a$      | $\delta_1$ (rad) | $B$       | $b$       | $\delta_2$ (rad) | $C$    |
|---------|-----------|----------|------------------|-----------|-----------|------------------|--------|
| 296     | 0.0026563 | 0.015171 | -1.1826          | 0.0028229 | -0.013695 | 1.3252           | 1.9806 |
| 143     | 0.0028108 | 0.017603 | 2.1338           | 0.001487  | -0.032032 | -1.2829          | 2.0003 |
| 133     | 0.0023485 | 0.017509 | 1.9739           | 0.0010502 | -0.035027 | -0.6962          | 2.0008 |
| 123     | 0.0028008 | 0.018198 | 1.7697           | 0.0013858 | -0.03559  | -0.31621         | 2.0009 |

$$*\chi_s(\theta) \text{ or } g_i(\theta) = A\sin^2(a\theta + \delta_1) + B\sin^2(b\theta + \delta_2) + C, (i = x, y, z)$$

**Table S15.** Best-fitting parameters in Eq. 2\* for reproducing the observed  $\theta$ -dependencies of  $g_z$ -values at different temperatures for the  $c$ -axis rotation spectra (Fig. S2).

| $T$ (K) | $A$       | $a$       | $\delta_1$ (rad) | $B$        | $b$        | $\delta_2$ (rad) | $C$    |
|---------|-----------|-----------|------------------|------------|------------|------------------|--------|
| 296     | 0.0077549 | 0.017961  | 2.0427           | 0.0041656  | -0.0078868 | 0.1412           | 2.0148 |
| 143     | 0.0064882 | -0.017556 | -2.1536          | 0.00077104 | 0.051054   | 0.88441          | 2.0122 |
| 133     | 0.0029475 | 0.01759   | 2.1978           | 0.00034484 | 0.037143   | 1.2966           | 2.0096 |
| 123     | 0.0056467 | 0.017425  | 2.0973           | 0.0011569  | -0.039852  | 2.4484           | 2.0099 |

$$*\chi_s(\theta) \text{ or } g_i(\theta) = A\sin^2(a\theta + \delta_1) + B\sin^2(b\theta + \delta_2) + C, (i = x, y, z)$$

**Table S16.** Best-fitting parameters in Eq. 2\* for reproducing the observed  $\theta$ -dependencies of spin susceptibilities  $\chi_s$  at different temperatures for the  $c$ -axis rotation spectra (Fig. S2).

| $T$ (K) | $A$    | $a$      | $\delta_1$ (rad) | $B$    | $b$       | $\delta_2$ (rad) | $C$    |
|---------|--------|----------|------------------|--------|-----------|------------------|--------|
| 296     | 8.1999 | 0.017001 | -1.7147          | 3.7935 | -0.035296 | 2.2476           | 12.397 |
| 143     | 8.5936 | 0.017526 | -1.7334          | 3.7197 | -0.035112 | 3.6861           | 16.525 |
| 133     | 8.2938 | 0.017557 | -1.7603          | 3.1706 | -0.069647 | -0.6267          | 15.783 |
| 123     | 7.1473 | 0.017242 | -1.4331          | 5.0088 | -0.034026 | 2.8542           | 16.48  |

$$*\chi_s(\theta) \text{ or } g_i(\theta) = A\sin^2(a\theta + \delta_1) + B\sin^2(b\theta + \delta_2) + C, (i = x, y, z)$$

## References

S1 K. Bender, I. Hennig, D. Schweitzer, K. Dietz, H. Endres and H. J. Keller, *Mol. Cryst. Liq. Cryst.*, 1984, **108**, 359.
